# Supplementary material for: Joint electrical, photophysical and computational studies on D-π-A dye sensitized solar cells: the impacts of dithiophene rigidification
Source: Royal Society of Chemistry journal article supplement (doi:10.1039/c2sc00973k), 2011-12-20
Supplement: c2sc00973k.pdf [file c2sc00973k.pdf]

*Electronic supplementary information*

**Joint electrical, photophysical and computational studies on D- $\pi$ -A dye sensitized solar cells: the impacts of dithiophene rigidification**

Mingfei Xu,<sup>a</sup> Min Zhang,<sup>a</sup> Mariachiara Pastore,<sup>b</sup> Renzhi Li,<sup>\*a</sup> Filippo De Angelis<sup>\*b</sup> and Peng Wang<sup>\*a</sup>

<sup>a</sup> State Key Laboratory of Polymer Physics and Chemistry, Changchun Institute of Applied Chemistry, Chinese Academy of Sciences, Changchun 130022, China.

<sup>b</sup> Istituto CNR di Scienze e Tecnologie Molecolari (CNR-ISTM), c/o Dipartimento di Chimica, Università di Perugia, Via Elce di Sotto 8, I-06123, Perugia, Italy.

E-mail: [renzhi.li@ciac.jl.cn](mailto:renzhi.li@ciac.jl.cn); [filippo@thch.unipg.it](mailto:filippo@thch.unipg.it); [peng.wang@ciac.jl.cn](mailto:peng.wang@ciac.jl.cn)

## 1. Synthesis of C239, C240 and C241 intermediates

**Scheme S1.** Synthetic route of C239, C240 and C241<sup>a</sup>

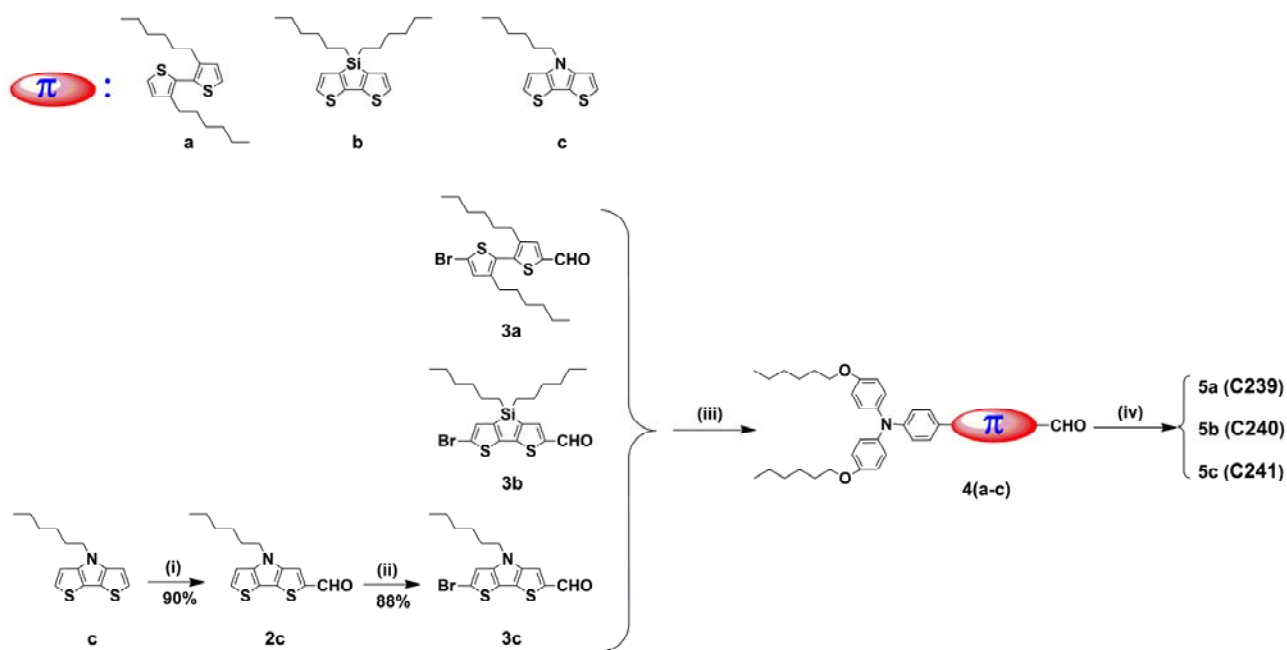

<sup>a</sup> Reagents: (i) 1.5 equiv. POCl<sub>3</sub>, 2.0 equiv. DMF, 1,2-dichloroethane, 0–40 °C, 6 h; (ii) 1.1 equiv. NBS, THF, 0 °C–RT, 5 h; (iii) 1.2 equiv. 4,4,5,5-tetramethyl-2- $\{4-[N,N$ -bis(4-hexyloxyphenyl)amino]phenyl $\}$ -1,3,2-dioxaborolane, 2% Pd(OAc)<sub>2</sub>, 2% SPhos, 5.0 equiv. K<sub>3</sub>PO<sub>4</sub>, dioxane/H<sub>2</sub>O (v/v, 5:1), RT, overnight; (iv) 3.0 equiv. cyanoacetic acid, 7.0 equiv. piperidine, CHCl<sub>3</sub>, reflux, 18 h.

### Synthesis of intermediates

5-Bromo-5'-formyl-3,3'-dihexyl-2,2'-bithiophene (3a),<sup>S1</sup>

5-bromo-5'-formyl-3,3'-di-*n*-hexylsilylene-2,2'-bithiophene (3b),<sup>S2</sup> *N*-hexyldithieno[3,2-*b*:2',3'-*d*]pyrrole (c)<sup>S3</sup> and

4,4,5,5-tetramethyl-2- $\{4-[N,N$ -bis(4-hexyloxyphenyl)amino]phenyl $\}$ -1,3,2-dioxaborolane<sup>S4</sup> were prepared according to the corresponding literature methods.

*N*-Hexyldithieno[3,2-*b*:2',3'-*d*]pyrrole-5-carbaldehyde (2c). To a solution of **c** (1.87 g, 7.11 mmol) and *N,N*-dimethylformide (1.10 mL, 14.22 mmol) in 1,2-dichloroethane (100 mL) was added phosphorus chloride oxide (0.99 mL, 10.67 mmol) under argon at 0 °C. The reaction mixture was stirred at 0 °C for 2 h and then heated to 40 °C for another 4 h. Subsequently, saturated sodium acetate aqueous solution (50 mL) was added. The mixture was further stirred at room temperature for 2 h. The crude product was extracted into dichloromethane.

The organic layer was washed with brine and water, and dried over anhydrous sodium sulfate. After removing solvent under reduced pressure, the residue was purified by column chromatography (ethyl acetate/petroleum ether 60–90 °C, 1/10, v/v) on silica gel to yield a yellowish powder (1.87 g, 90% yield). <sup>1</sup>H NMR (400 MHz, CDCl<sub>3</sub>) δ: 9.88 (s, 1H), 7.65 (s, 1H), 7.38 (d, *J*=5.6 Hz, 1H), 7.02 (d, *J*=5.6 Hz, 1H), 4.23 (t, *J*=6.8 Hz, 2H), 1.89 (m, 2H), 1.31 (m, 6H), 0.86 (t, *J*=6.8 Hz, 3H). <sup>13</sup>C NMR (150 MHz, CDCl<sub>3</sub>) δ: 182.90, 149.14, 144.22, 140.00, 128.43, 123.16, 119.35, 114.88, 110.85, 47.45, 31.29, 30.17, 26.59, 22.41, 13.91. MS (ESI) *m/z* calcd. for (C<sub>15</sub>H<sub>17</sub>NOS<sub>2</sub>): 291.1. Found: 292.1 ([M+H]<sup>+</sup>). Anal. Calcd. for C<sub>15</sub>H<sub>17</sub>NOS<sub>2</sub>: C, 61.82; H, 5.88; N, 4.81. Found: C, 61.77; H, 5.92; N, 4.79.

*5'-Bromo-N-hexyldithieno[3,2-*b*:2',3'-*d*]pyrrole-5-carbaldehyde (3c)*. To a cold solution of **2c** (0.70 g, 2.40 mmol) in tetrahydrofuran (45 mL) was added *N*-bromosuccinimide (0.52 g, 2.92 mmol) at –10 °C under argon. The reaction mixture was warmed to room temperature and stirred for 4 h. Subsequently water (50 mL) was added to quench the reaction. The crude product was extracted into ethyl acetate. The organic layer was washed with saturated sodium bicarbonate aqueous solution, brine and water, and dried over anhydrous sodium sulfate. After removing solvent under reduced pressure, the residue was purified by column chromatography (ethyl acetate/petroleum ether 60–90 °C, 1/10, v/v) on silica gel to yield a yellow solid (0.78 g, 88% yield). <sup>1</sup>H NMR (400 MHz, CDCl<sub>3</sub>) δ: 9.88 (s, 1H), 7.63 (s, 1H), 7.08 (s, 1H), 4.17 (t, *J*=6.8 Hz, 2H), 1.86 (m, 2H), 1.29 (m, 6H), 0.87 (t, *J*=6.8 Hz, 3H). <sup>13</sup>C NMR (150 MHz, CDCl<sub>3</sub>) δ: 182.91, 149.15, 144.24, 140.04, 128.44, 123.20, 119.33, 114.92, 110.85, 47.48, 31.31, 30.19, 26.61, 22.43, 13.92. MS (ESI) *m/z* calcd. for (C<sub>15</sub>H<sub>16</sub>BrNOS<sub>2</sub>): 369.0. Found: 370.1 ([M+H]<sup>+</sup>). Anal. Calcd. for C<sub>15</sub>H<sub>16</sub>BrNOS<sub>2</sub>: C, 48.65; H, 4.35; N, 3.78. Found: C, 48.57; H, 4.39; N, 3.73.

*General Synthesis of 4*. To a suspended solution of **3a**, **3b** or **3c** (1.0 equiv.), 4,4,5,5-tetramethyl-2-{4-[*N,N*-bis(4-hexyloxyphenyl)amino]phenyl}-1,3,2-dioxaborolane (1.2 equiv.), SPhos (2% equiv.) and K<sub>3</sub>PO<sub>4</sub> (5.0 equiv.) in dioxane/H<sub>2</sub>O (5/1, v/v) was added Pd(OAc)<sub>2</sub> (2% equiv.). The reaction mixture was stirred at room temperature overnight under argon and then added water. The crude compound was extracted into ethyl acetate, washed with brine and water, and dried over anhydrous sodium sulfate. After removing solvent under reduced pressure, the residue was purified by column chromatography (ethyl acetate/petroleum ether 60–90 °C, 1/10, v/v) on silica gel.

*5-{4-[*N,N*-Bis(4-hexyloxyphenyl)amino]phenyl}-(3,3'-dihexyl-2,2'-bithiophene)-5'-carbaldehyde (4a)*. Viscous orange oil. Yield: 90%. <sup>1</sup>H NMR (400 MHz, DMSO-*d*<sub>6</sub>) δ: 9.88 (s, 1H), 7.99 (s, 1H), 7.46 (d, *J*=8.8 Hz, 2H), 7.32 (s, 1H), 7.03 (d, *J*=8.8 Hz, 4H), 6.91 (d, *J*=8.8 Hz, 4H), 6.76 (d, *J*=8.8 Hz, 2H), 3.94 (t, *J*=6.4 Hz, 4H), 2.58 (m, 4H), 1.70 (m, 4H), 1.55 (m, 4H), 1.42 (m, 4H), 1.32 (m, 8H), 1.21 (m, 12H), 0.88 (t, *J*=6.8 Hz, 6H), 0.81 (t, *J*=6.8

Hz, 6H).  $^{13}\text{C}$  NMR (150 MHz,  $\text{DMSO-}d_6$ )  $\delta$ : 184.01, 155.46, 148.36, 144.47, 143.89, 143.28, 141.95, 139.46, 139.33, 131.67, 126.90, 126.20, 124.42, 124.11, 124.06, 118.97, 115.50, 67.61, 30.97, 30.87, 29.83, 29.67, 28.68, 28.53, 28.31, 28.21, 25.18, 22.04, 21.92, 13.87, 13.84. MS (ESI)  $m/z$  calcd. for ( $\text{C}_{51}\text{H}_{67}\text{NO}_3\text{S}_2$ ): 805.5. Found: 806.6 ( $[\text{M}+\text{H}]^+$ ). Anal. Calcd. for  $\text{C}_{51}\text{H}_{67}\text{NO}_3\text{S}_2$ : C, 75.98; H, 8.38; N, 1.74. Found: C, 76.01; H, 8.41; N, 1.69.

5'-{4-[*N,N*-Bis(4-(hexyloxy)phenyl)amino]phenyl}-3,3'-di-*n*-hexylsilylene-2,2'-bithiophene-5'-carbaldehyde (**4b**). Orange oil. Yield: 76%.  $^1\text{H}$  NMR (600 MHz,  $\text{DMSO-}d_6$ )  $\delta$ : 9.86 (s, 1H), 8.05 (s, 1H), 7.50 (d,  $J=9.0$  Hz, 2H), 7.48 (s, 1H), 7.05 (d,  $J=8.4$  Hz, 4H), 6.92 (d,  $J=8.4$  Hz, 4H), 6.75 (d,  $J=9.0$  Hz, 2H), 3.94 (t,  $J=6.4$  Hz, 4H), 1.69 (m, 4H), 1.42 (m, 4H), 1.31 (m, 12H), 1.24 (m, 4H), 1.17 (m, 8H), 0.97 (m, 4H), 0.88 (t,  $J=6.9$  Hz, 6H), 0.79 (t,  $J=6.6$  Hz, 6H).  $^{13}\text{C}$  NMR (150 MHz,  $\text{DMSO-}d_6$ )  $\delta$ : 183.47, 157.17, 155.56, 148.77, 148.57, 148.47, 144.05, 143.74, 141.92, 141.16, 139.30, 127.07, 126.52, 125.15, 124.50, 118.72, 115.51, 67.60, 31.88, 30.95, 30.68, 28.65, 25.16, 23.42, 22.02, 21.85, 18.51, 13.86, 11.08. MS (ESI)  $m/z$  calcd. for ( $\text{C}_{51}\text{H}_{67}\text{NO}_3\text{S}_2\text{Si}$ ): 833.43. Found: 834.44 ( $[\text{M}+\text{H}]^+$ ). Anal. Calcd. for  $\text{C}_{51}\text{H}_{67}\text{NO}_3\text{S}_2\text{Si}$ : C, 73.42; H, 8.09; N, 1.68; Found: C, 73.50; H, 8.13; N, 1.63.

5'-{4-[*N,N*-Bis(4-(hexyloxy)phenyl)amino]phenyl}-*N*-hexyldithieno[3,2-*b*:2',3'-*d*]pyrrole-5-carbaldehyde (**4c**). Viscous orange oil. Yield: 94%.  $^1\text{H}$  NMR (400 MHz,  $\text{DMSO-}d_6$ )  $\delta$ : 9.84 (s, 1H), 8.19 (s, 1H), 7.63 (s, 1H), 7.53 (d,  $J=8.8$  Hz, 2H), 7.04 (d,  $J=8.8$  Hz, 4H), 6.91 (d,  $J=8.8$  Hz, 4H), 6.78 (d,  $J=8.8$  Hz, 2H), 4.33 (t,  $J=6.8$  Hz, 2H), 3.93 (t,  $J=6.4$  Hz, 4H), 1.83 (m, 2H), 1.70 (m, 4H), 1.41 (m, 4H), 1.30 (m, 8H), 1.21 (m, 6H), 0.88 (t,  $J=6.8$  Hz, 6H), 0.81 (t,  $J=6.8$  Hz, 3H).  $^{13}\text{C}$  NMR(150 MHz,  $\text{DMSO-}d_6$ )  $\delta$ : 183.37, 155.44, 149.68, 148.39, 146.50, 143.49, 139.38, 139.08, 126.85, 126.12, 125.79, 121.95, 121.90, 118.97, 115.43, 111.98, 106.41, 67.58, 46.52, 30.95, 30.72, 29.61, 28.66, 25.81, 25.16, 22.02, 21.94, 13.84, 13.77. MS (ESI)  $m/z$  calcd. for ( $\text{C}_{45}\text{H}_{54}\text{N}_2\text{O}_3\text{S}_2$ ): 734.4. Found: 735.5 ( $[\text{M}+\text{H}]^+$ ). Anal. Calcd. for  $\text{C}_{45}\text{H}_{54}\text{N}_2\text{O}_3\text{S}_2$ : C, 73.53; H, 7.40; N, 3.81. Found: C, 73.47; H, 7.45; N, 3.76.

## 2. Analysis of chemical capacitance ( $C_\mu$ ) and interfacial charge transfer resistance ( $R_{ct}$ )

We estimate the quantity of  $E_c - E_{F,redox}$  by analyzing the chemical capacitance ( $C_\mu$ ), which takes the following equation:<sup>S5</sup>

$$C_\mu = \frac{e^2 N_t d (1-p)}{k_B T_c} \exp\left(\frac{E_{F,redox} - E_c}{k_B T_c}\right) \exp\left(\frac{E_{F,n} - E_{F,redox}}{k_B T_c}\right) \quad S1$$

where  $e$  is the elementary charge,  $N_t$  is the total density of surface states (taken as a constant  $2 \times 10^{20} \text{ cm}^{-3}$  so as to facilitate a comparative study<sup>S6</sup>),  $d$  is the thickness of the titania film (2.1  $\mu\text{m}$ ),  $p$  is the film porosity (0.64),  $k_B$  is the Boltzmann constant, and  $T_c$  is a parameter depicting the distribution profile of interband states. Fitting the  $C_\mu$  data in Fig. S4A to eqn S1 directly affords the values of  $E_c - E_{F,redox}$  and  $T_c$ .

Consider the recently developed  $\beta$ -recombination model, the rate of charge recombination at the titania/electrolyte interface can be expressed as a function of free electron density in titania  $n_c$ , the effective reaction rate constant  $k_0$ , and the reaction order of titania electrons:<sup>S7</sup>

$$U_n = k_0 n_c^\beta \quad S2$$

Combining eqn S2 and the function for  $n_c$

$$n_c = N_c \exp\left(\frac{E_{F,n} - E_c}{k_B T}\right) \quad S3$$

where  $N_c$  is taken as  $7 \times 10^{20} \text{ cm}^{-3}$ , and the definition of the charge recombination resistance  $R_{ct}$ <sup>S7</sup>

$$R_{ct} = \frac{1}{A} \left( \frac{\partial j_{rec}}{\partial (E_{F,n} - E_{F,redox})} \right) e^{-1} \quad S4$$

where  $A$  is the projection area of titania film (0.158  $\text{cm}^2$ ), and  $j_{rec}$  is the recombination current, we have<sup>S8</sup>

$$R_{ct} = \frac{k_B T}{k_0 \beta N_c^\beta e^2 d A} \exp\left[\frac{\beta(E_c - E_{F,redox})}{k_B T}\right] \exp\left(-\frac{\beta(E_{F,n} - E_{F,redox})}{k_B T}\right) \quad S5$$

Defining effective recombination constant  $U_{0k} = k_0 N_c^\beta$ , eqn S5 becomes

$$R_{ct} = \frac{k_B T}{U_{0k} \beta e^2 d A} \exp\left[\frac{\beta(E_c - E_{F,redox})}{k_B T}\right] \exp\left(-\frac{\beta(E_{F,n} - E_{F,redox})}{k_B T}\right) \quad S6$$

On the basis of the as-resolved  $E_c - E_{F,redox}$  values, fitting the  $R_{ct}$  data in Fig. S4C gives  $\beta$ ,  $k_0$  and  $U_{0k}$ .

### 3. Additional experimental data

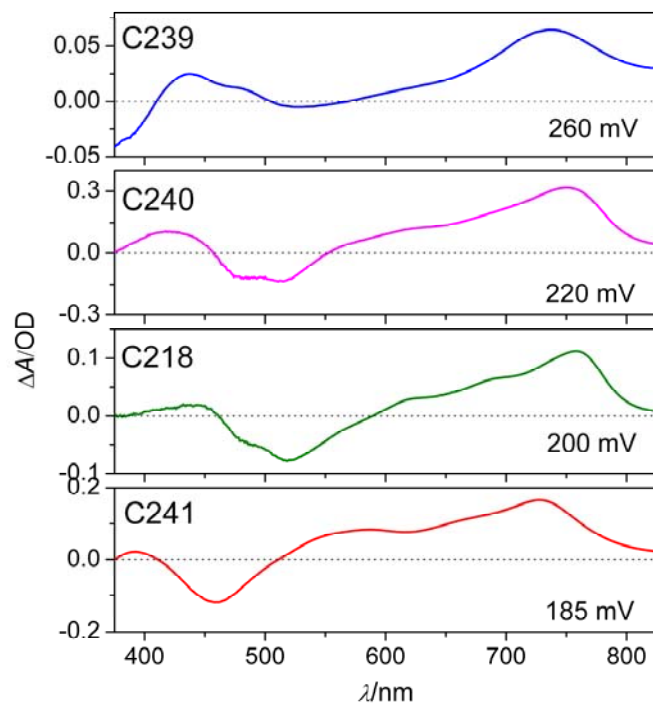

**Fig. S1.** Wavelength-dependent absorption change upon applying a positive potential bias to a 2.1- $\mu\text{m}$ -thick, dye-coated titania film immersed in 1-ethyl-3-methylimidazolium bis(trifluoromethanesulfonyl)imide. The applied potentials are reported versus the ferrocene/ferrocenium reference.

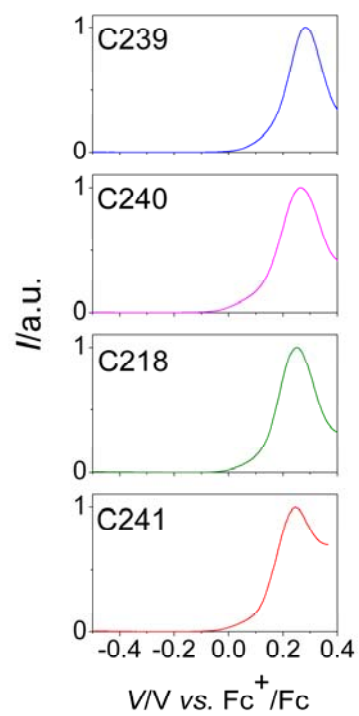

**Fig. S2.** Normalized square-wave voltammograms of dye-coated titania films in contact with an electrolyte composed of 0.1 M LiTFSI and 0.5 M TBP in acetonitrile.

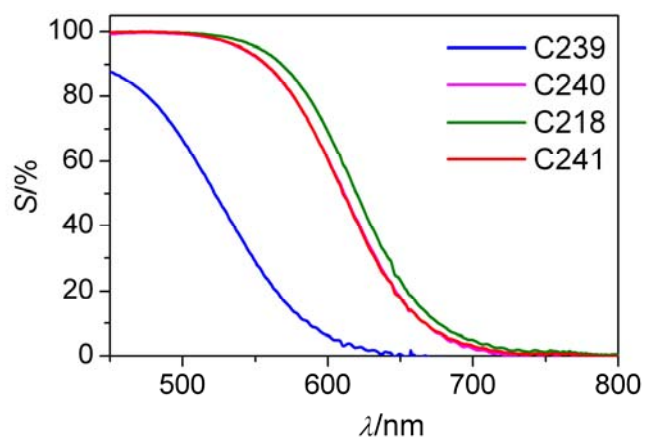

**Fig. S3.** Absorption percentages (*S*) of 2.1- $\mu\text{m}$ -thick, dye-coated titania films immersed in the cobalt electrolyte for cell fabrication.



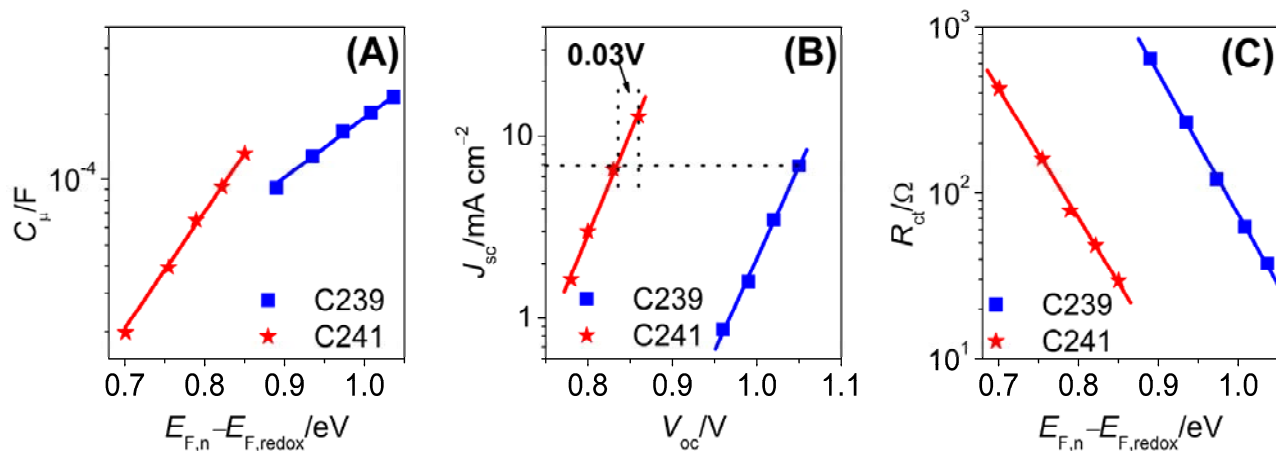

**Fig. S4.** (A) Chemical capacitance ( $C_{\mu}$ ) of a mesoporous titania film. (B) Plots of  $J_{sc}$  versus  $V_{oc}$ . (C) Charge transfer resistance ( $R_{ct}$ ) at the titania/electrolyte interface. Solid lines are fittings to proper functions.

#### 4. References

- (S1) N. Hayashi, T. Nishihara, T. Matsukihira, H. Nakashima, K. Miyabayashi, M. Miyake and H. Higuchi, *Bull. Chem. Soc. Jpn.*, 2007, **80**, 371.
- (S2) W. Zeng, Y. Cao, Y. Bai, Y. Wang, Y. Shi, M. Zhang, F. Wang, C. Pan and P. Wang, *Chem. Mater.*, 2010, **22**, 1915.
- (S3) G. Koeckelberghs, L. De Cremer, W. Vanormelingen, W. Dehaen, T. Verbiest, A. Persoons and C. Samyn, *Tetrahedron*, 2005, **61**, 687.
- (S4) R. Li, J. Liu, N. Cai, M. Zhang and P. Wang, *J. Phys. Chem. B*, 2010, **114**, 4461.
- (S5) J. Bisquert, *Phys. Chem. Chem. Phys.*, 2003, **5**, 5360.
- (S6) E. M. Barea, J. Ortiz, F. J. Payá, F. Fernández-Lazaro, F. Fabregat-Santiago, A. Sastre-Santos and J. Bisquert, *Energy Environ. Sci.*, 2010, **3**, 1985.
- (S7) J. Bisquert and I. Mora-Seró, *J. Phys. Chem. Lett.*, 2010, **1**, 450.
- (S8) Y. Bai, J. Zhang, Y. Wang, M. Zhang and P. Wang, *Langmuir*, 2011, **27**, 4749.
